# Supplementary material for: Platinum(iv) centres with agostic interactions from either sp2 or sp3 C–H bonds
Source: Royal Society of Chemistry journal article supplement (doi:10.1039/c0dt01428a), 2011-01-01
Supplement: c0dt01428a.pdf [file c0dt01428a.pdf]

## Supporting Information:

### Platinum(IV) centres with agostic interactions from either $sp^2$ or $sp^3$ C-H bonds.

Sarah H Crosby, Robert J Deeth, Guy J Clarkson and Jonathan P Rourke\*

Department of Chemistry, Warwick University, Coventry. UK CV4 7AL.

## Experimental

### General Considerations.

All chemicals were used as supplied, unless noted otherwise. All NMR spectra were obtained on a Bruker Avance, 400, 500 or 700 MHz spectrometer and  $^1\text{H}$  and  $^{13}\text{C}$  chemical shifts are referenced to external TMS, assignments being made with the use of decoupling, nOe and the HMBC, HMQC, DEPT and COSY pulse sequences.  $^{19}\text{F}$  chemical shifts are quoted from the directly observed signals and are referenced to external  $\text{CFCl}_3$ .  $^1\text{H}$ - $^{195}\text{Pt}$  correlation spectra were recorded using a variant of the HMBC pulse sequence with the  $^{195}\text{Pt}$  chemical shifts quoted taken from the 2D HETCOR spectra and referenced to external  $\text{Na}_2\text{PtCl}_6$ . All accurate mass spectra were run on a Bruker micrOTOF and Bruker MaXis mass spectrometer and X-ray crystal structures were collected on an Oxford Diffraction Gemini four-circle system with Ruby CCD area detector. Dichloro(phenyl)- $\lambda^3$ -iodane (often referred to as iodobenzene dichloride) was made via a literature route (R. T. Taylor, T. A. Stevenson, *Tetrahedron Lett.* **1988**, 29, 2033). Complexes 1 and 3 were synthesised as previously described (S H Crosby, G J Clarkson and J P Rourke. *J. Am. Chem. Soc.*, 2009, **131**, 14142)

### Synthesis of Complex 2.

To a  $\text{CDCl}_3$  solution of complex 1 (5 mg) in an NMR tube was added 1 eq dichloro(phenyl)- $\lambda^3$ -iodane and the reaction observed to go to completion within 10 minutes. The solvent was removed and the product washed with petroleum ether (40-60) to give a pure compound, 2 (5mg, 86%). Crystals of 2 suitable for single crystal analysis were formed by slow evaporation of solvent from a chloroform solution.

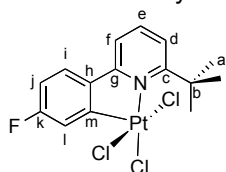

$\delta_{\text{H}}$  (700 MHz, 298 K,  $\text{CDCl}_3$ ): 7.93 (1H, t,  $^3J = 8$  Hz,  $\text{H}_e$ ), 7.71 (1H, d,  $^3J = 8$  Hz,  $\text{H}_f$ ), 7.48 (1H, d,  $^3J = 8$  Hz,  $\text{H}_d$ ), 7.40 (1H, dd,  $^3J = 8.6$  Hz,  $^4J_{\text{H-F}} = 5.5$  Hz,  $\text{H}_i$ ), 7.31 (1H, dd,  $^3J_{\text{H-F}} = 8.3$  Hz,  $^4J = 2.4$  Hz,  $^3J_{\text{H-Pt}} = 42$  Hz,  $\text{H}_l$ ), 7.00 (1H, td,  $^3J_{\text{H-H, H-F}} = 8.2$  Hz,  $^4J = 2.4$  Hz,  $\text{H}_j$ ), 1.84 (9H, s,  $J_{\text{H-Pt}} = 5$  Hz,  $\text{H}_a$ ) ppm.

$\delta_{\text{C}}$  (100 MHz, 298 K,  $\text{CDCl}_3$ ): 141.2 ( $\text{C}_e$ ), 126.4 (d,  $^3J_{\text{C-F}} = 10$  Hz,  $\text{C}_i$ ), 124.4 ( $\text{C}_{\text{d/f}}$ ), 119.5 ( $\text{C}_l$ ), 119.3 ( $^3J_{\text{C-Pt}} = 29$  Hz,  $\text{C}_{\text{b/d}}$ ), 115.6 (d,  $^2J_{\text{C-F}} = 23$  Hz,  $\text{C}_j$ ), 32.3 ( $J_{\text{C-Pt}} = 21$  Hz,  $\text{C}_a$ ) ppm.

$\delta_{\text{F}}$  (375 MHz, 298 K,  $\text{CDCl}_3$ ): -98.8 ( $^4J_{\text{F-Pt}} = 33$  Hz) ppm.

$\delta_{\text{Pt}}$ : -1016 ppm.

Accurate Mass: 549.9770 calculated for  $\text{C}_{15}\text{H}_{15}^{35}\text{Cl}_3\text{FNNa}^{194}\text{Pt} = (\text{M}+\text{Na})^+$  549.9773

### Synthesis of Complexes 4 and 5.

Complex 3 (5 mg) was dissolved in  $\text{CDCl}_3$  in an NMR tube and 1 eq of dichloro(phenyl)- $\lambda^3$ -iodane added at  $-40^\circ\text{C}$ . The reaction was followed by both  $^1\text{H}$ - and  $^{19}\text{F}$ -NMR and the reaction proceeded to give a single product, 4.

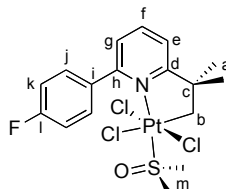

Spectroscopic data for 4

$\delta_{\text{H}}$  (500 MHz, 233 K,  $\text{CDCl}_3$ ): 7.88 (1H, t,  $^3J = 7.8$  Hz,  $\text{H}_f$ ), 7.55 (2H, dd,  $^3J = 8.6$  Hz,  $^4J_{\text{H-F}} = 5.2$  Hz,  $\text{H}_j$ ), 7.30 (1H, dd,  $^3J = 7.5$  Hz,  $^4J = 1.0$  Hz,  $\text{H}_g$ ), 7.21 (1H, dd,  $^3J = 7.6$  Hz,  $^4J = 1.4$  Hz,  $\text{H}_e$ ), 7.11 (2H, t,  $^3J_{\text{H-H, H-F}} = 8.7$  Hz,  $\text{H}_k$ ), 4.11 (2H, s,  $^2J_{\text{H-Pt}} = 72.5$  Hz,  $\text{H}_b$ ), 3.58 (6H, s,  $^3J_{\text{H-Pt}} = 15.5$  Hz,  $\text{H}_m$ ), 1.56 (6H, s,  $\text{H}_a$ ) ppm.

$\delta_{\text{C}}$  (100 MHz, 233 K,  $\text{CDCl}_3$ ): 140.9 ( $\text{C}_f$ ), 131.9 ( $\text{C}_j$ ), 122.6 ( $\text{C}_g$ ), 128.7 ( $\text{C}_e$ ), 115.0 ( $\text{C}_k$ ), 53.7 ( $\text{C}_b$ ), 40.7 ( $\text{C}_m$ ), 33.0 ( $\text{C}_a$ ) ppm. (Aromatic protons taken from HMQC)

$\delta_F$  (375 MHz, 253 K,  $CDCl_3$ ): -111.4 ppm.

$\delta_{Pt}$ : -1568 ppm.

On warming to room temperature this product, 4, was observed *via*  $^1H$ -NMR to transform into a new product, 5. The solvent was removed and the product washed with petroleum ether (40-60) to give a pure complex, 5 (4mg).

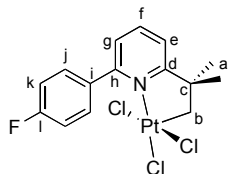

Spectroscopic data for 5

$\delta_H$  (500 MHz, 298 K,  $CDCl_3$ ): 8.04 (2H, dd,  $^3J = 8.8$  Hz,  $^4J_{H-F} = 5$  Hz,  $H_i$ ), 8.03 (1H, t,  $^3J = 7.8$  Hz,  $H_f$ ), 7.52 (1H, dd,  $^3J = 7.8$  Hz,  $^4J = 1.3$  Hz,  $H_g$ ), 7.36 (1H, dd,  $^3J = 8$  Hz,  $^4J = 1.5$  Hz,  $H_e$ ), 7.35 (2H, t,  $^3J_{H-H, H-F} = 8.5$  Hz,  $H_k$ ), 5.25 (2H, s,  $^2J_{H-Pt} = 87$  Hz,  $H_b$ ), 1.63 (6H, s,  $H_a$ ) ppm.

$\delta_C$  (100 MHz, 298 K,  $CDCl_3$ ): 172.3 ( $C_d$ ), 164.4 (d,  $^1J_{C-F} = 254$  Hz,  $C_i$ ), 158.2 ( $C_h$ ), 141.1 ( $C_f$ ), 131.7 (d,  $^4J_{C-F} = 4$  Hz,  $C_j$ ), 130.8 (d,  $^3J_{C-F} = 8.5$ ,  $J_{C-Pt} = 7$  Hz,  $C_j$ ), 126.1 ( $^3J_{C-Pt} = 24.5$  Hz,  $C_g$ ), 122.6 ( $^3J_{C-Pt} = 37.5$  Hz,  $C_e$ ), 118.0 (d,  $^2J_{C-F} = 20$  Hz,  $C_k$ ), 55.6 ( $^1J_{C-Pt} = 487$  Hz,  $C_b$ ), 51.9 ( $C_c$ ), 29.7 ( $^3J_{C-Pt} = 17.5$  Hz,  $C_a$ ) ppm.

$\delta_F$  (375 MHz, 298 K,  $CDCl_3$ ): -107.1 ppm.

$\delta_{Pt}$ : -851 ppm.

Accurate Mass: 549.9774 calculated for  $C_{15}H_{15}^{35}Cl_3FNNa^{194}Pt = (M+Na)^+$  549.9773, 492.0189 calculated for  $C_{15}H_{15}^{35}Cl_2FN^{194}Pt = (M-Cl)^+$  492.0187

### Comparison of coupling constants

The values (Hz) of  $^1J(Pt-C_b)$  and  $^2J(Pt-H_b)$  for complexes 3, 4 and 5 are as follows:

| Complex | $^1J(Pt-C_b)$ | $^2J(Pt-H_b)$ |
|---------|---------------|---------------|
| 3       | 702           | 59            |
| 4       | -             | 72            |
| 5       | 487           | 87            |

The  $^1J(Pt-C_b)$  follows the expected trend of decreasing with increasing oxidation state. However, the  $^2J(Pt-H_b)$  does not. We suggest that this apparently counter-intuitive change is down to the angular dependence of the  $^2J(Pt-H_b)$ , whereby a change in geometry alters the Pt-C-H bond angle, affecting the coupling.

## Crystallographic data for sc14 (Complex 2)

The asymmetric unit contains the trichloro Pt complex. There are 4 in the unit cell. The hydrogens on C16 were located in a difference map and their position allowed to refine freely but given isotropic displacement parameters equal to 1.2 (or 1.5 for methyl hydrogen atoms) times the equivalent isotropic displacement parameter of C16 to which they are attached.

Bond lengths and angles for the C16 methyl are

1.0409 (0.0337) Angstroms C16 - H16A

1.0342 (0.0327) Angstroms C16 - H16B

0.9290 (0.0345) Angstroms C16 - H16C

112.22 ( 1.82)  $C_{13} - C_{16} - H_{16A}$

103.64 ( 1.75)  $C_{13} - C_{16} - H_{16B}$

107.45 ( 2.12)  $C_{13} - C_{16} - H_{16C}$

(An idealized methyl group would be 0.98 Angstroms and about 108 degrees)

Pt1 distances to C16 and H16A are shown below

2.1568 (0.0316) H16A - Pt1

2.7212 (0.0029) C16 - Pt1

Torsion angles

17.55 ( 0.37) degrees N1 - C2 - C13 - C16

Short contacts

Specified hydrogen bonds (with esds except fixed and riding H)

| D-H  | H...A | D...A    | <(DHA) |                  |
|------|-------|----------|--------|------------------|
| 0.95 | 2.78  | 3.707(3) | 167.0  | C3-H3A...C12_\$1 |
| 0.95 | 2.47  | 3.344(3) | 152.3  | C9-H9A...F10_\$2 |

There is no meaningful pi stacking as the molecules cant seem to get close enough because the three chlorines are fending them off.

#### Crystal Data

C<sub>15</sub>H<sub>15</sub>Cl<sub>3</sub>F<sub>3</sub>NPt, M = 529.72, Monoclinic, space group P2(1)/c  
a = 13.0861(2), b = 8.07835(10), c = 15.9059(3) Å,  
alpha = 90 deg., beta = 111.7518(19) deg., gamma = 90 deg.,  
U = 1561.75(4) Å<sup>3</sup> (by least squares refinement on 11638 reflection positions),  
T = 100(2)K, lambda = 0.71073 Å, Z = 4,  
D(cal) = 2.253 Mg/m<sup>3</sup>, F(000) = 1000.  
mu(MoK-alpha) = 9.499 mm<sup>-1</sup>.  
Crystal character: colourless plate.  
Crystal dimensions 0.15 x 0.15 x 0.01 mm,

#### Data Collection and Processing.

Oxford Diffraction Gemini four-circle system with Ruby CCD area detector.  
The crystal was held at 100(2)K with the Oxford Cryosystem Cobra.  
Maximum theta was 30.82 deg.  
The hkl ranges were -14/ 18, -11/ 11, -22/ 20.  
18193 reflections measured, 4551 unique [R(int) = 0.0402].  
Absorption correction by Semi-empirical from equivalents;  
minimum and maximum transmission factors: 0.42; 1.00.  
no crystal decay

#### Structure Analysis and Refinement.

Systematic absences indicated space group P2(1)/c and shown to be correct by successful refinement.

The structure was solved by direct methods using SHELXS (Sheldrick, 1990) (TREF) with additional light atoms found by Fourier methods.

Hydrogen atoms were added at calculated positions and refined using a riding model with freely rotating methyl groups except the hydrogens on C16 which were located in a difference map and their position allowed to refine freely. Anisotropic displacement parameters were used for all non-H atoms; H-atoms were given isotropic displacement parameters equal to 1.2 (or 1.5 for methyl hydrogen atoms) times the equivalent isotropic displacement parameter of the atom to which the H-atom is attached.

The absolute structure of the individual crystal chosen was checked by refinement of a delta-f" multiplier.

Floating origin constraints were generated automatically.

The weighting scheme was calc  $w=1/[\sigma^2(F_o^2)+(0.0207P)^2+0.0000P]$  where  $P=(F_o^2+2F_c^2)/3$ .

Goodness-of-fit on F<sup>2</sup> was 0.972,

R1[for 3917 reflections with I > 2sigma(I)] = 0.0204, wR2 = 0.0428.

Data / restraints / parameters 4551/ 0/ 201.

Largest difference Fourier peak and hole 1.400 and -1.780 e.Å<sup>-3</sup> .

Refinement used SHELXL 97 (Sheldrick, 1997).

The Oxford Diffraction Gemini XRD system was obtained through the Science City Advanced Materials project: Creating and Characterising Next Generation Advanced Materials, with support from Advantage West Midlands (AWM) and part funded by the European Regional Development Fund (ERDF)

#### References

For relevant information for the SHELXTL suite of programmes used to solve, refine and produce the files for this structure, please refer to "A Short History of Shelx, G. M. Sheldrick, Acta Cryst. 2008, A64, 112-122"

Use Mercury (Free from CCDC at [www.ccdc.cam.ac.uk/products/mercury](http://www.ccdc.cam.ac.uk/products/mercury)) to view the structure.

Table 1. Atomic coordinates ( x 10<sup>4</sup>) and equivalent isotropic displacement parameters (Å<sup>2</sup> x 10<sup>3</sup>) for sc14. U(eq) is defined as one third of the trace of the orthogonalized Uij tensor.

---

| x | y | z | U(eq) |
|---|---|---|-------|
|---|---|---|-------|

|       |            |           |            |       |
|-------|------------|-----------|------------|-------|
| Pt(1) | 2291.6(1)  | 5633.8(1) | 4156.1(1)  | 10(1) |
| N(1)  | 2177.6(18) | 7518(3)   | 3281.7(14) | 10(1) |
| Cl(1) | 2400.1(6)  | 3488.7(8) | 5134.8(4)  | 17(1) |
| Cl(2) | 739.3(5)   | 6614.1(8) | 4364.9(4)  | 14(1) |
| C(2)  | 1641(2)    | 7436(3)   | 2367.0(17) | 12(1) |
| Cl(3) | 3808.7(6)  | 4663.3(8) | 3905.9(5)  | 17(1) |
| C(3)  | 1653(2)    | 8813(3)   | 1856.5(18) | 15(1) |
| C(4)  | 2172(2)    | 10263(3)  | 2267.6(19) | 16(1) |
| C(5)  | 2691(2)    | 10325(3)  | 3196.2(19) | 15(1) |
| C(6)  | 2699(2)    | 8927(3)   | 3698.1(18) | 13(1) |
| C(7)  | 3275(2)    | 8766(3)   | 4678.9(18) | 13(1) |
| C(8)  | 3894(2)    | 10035(4)  | 5240.1(19) | 15(1) |
| C(9)  | 4450(2)    | 9764(4)   | 6155.9(19) | 17(1) |
| F(10) | 4960.3(14) | 7931(2)   | 7388.0(10) | 26(1) |
| C(10) | 4398(2)    | 8207(4)   | 6490.4(18) | 18(1) |
| C(11) | 3797(2)    | 6911(4)   | 5980.2(18) | 15(1) |
| C(12) | 3237(2)    | 7234(3)   | 5070.4(18) | 13(1) |
| C(13) | 1080(2)    | 5831(3)   | 1899.5(17) | 12(1) |
| C(14) | -62(2)     | 6261(4)   | 1182.0(19) | 17(1) |
| C(15) | 1804(2)    | 5044(4)   | 1430.7(19) | 15(1) |
| C(16) | 864(3)     | 4547(4)   | 2524.2(19) | 16(1) |

Table 2. Bond lengths [Å] and angles [deg] for sc14.

|              |           |
|--------------|-----------|
| Pt(1)-C(12)  | 1.996(3)  |
| Pt(1)-N(1)   | 2.029(2)  |
| Pt(1)-Cl(1)  | 2.2984(6) |
| Pt(1)-Cl(3)  | 2.3021(7) |
| Pt(1)-Cl(2)  | 2.3161(6) |
| Pt(1)-H(16A) | 2.16(3)   |
| N(1)-C(2)    | 1.363(3)  |
| N(1)-C(6)    | 1.366(3)  |
| C(2)-C(3)    | 1.381(4)  |
| C(2)-C(13)   | 1.539(4)  |
| C(3)-C(4)    | 1.389(4)  |
| C(3)-H(3A)   | 0.9500    |
| C(4)-C(5)    | 1.379(4)  |
| C(4)-H(4A)   | 0.9500    |
| C(5)-C(6)    | 1.380(4)  |
| C(5)-H(5A)   | 0.9500    |
| C(6)-C(7)    | 1.465(4)  |
| C(7)-C(12)   | 1.394(4)  |
| C(7)-C(8)    | 1.403(4)  |
| C(8)-C(9)    | 1.383(4)  |
| C(8)-H(8A)   | 0.9500    |
| C(9)-C(10)   | 1.377(4)  |
| C(9)-H(9A)   | 0.9500    |
| F(10)-C(10)  | 1.361(3)  |
| C(10)-C(11)  | 1.379(4)  |
| C(11)-C(12)  | 1.383(4)  |
| C(11)-H(11A) | 0.9500    |
| C(13)-C(16)  | 1.533(4)  |
| C(13)-C(15)  | 1.544(4)  |
| C(13)-C(14)  | 1.546(4)  |
| C(14)-H(14A) | 0.9800    |
| C(14)-H(14B) | 0.9800    |
| C(14)-H(14C) | 0.9800    |
| C(15)-H(15A) | 0.9800    |
| C(15)-H(15B) | 0.9800    |
| C(15)-H(15C) | 0.9800    |
| C(16)-H(16A) | 1.04(3)   |

|                    |            |
|--------------------|------------|
| C(16)-H(16B)       | 1.03(3)    |
| C(16)-H(16C)       | 0.93(3)    |
| C(12)-Pt(1)-N(1)   | 83.21(10)  |
| C(12)-Pt(1)-Cl(1)  | 97.41(8)   |
| N(1)-Pt(1)-Cl(1)   | 179.30(7)  |
| C(12)-Pt(1)-Cl(3)  | 90.30(8)   |
| N(1)-Pt(1)-Cl(3)   | 89.20(6)   |
| Cl(1)-Pt(1)-Cl(3)  | 91.12(2)   |
| C(12)-Pt(1)-Cl(2)  | 90.78(8)   |
| N(1)-Pt(1)-Cl(2)   | 89.79(6)   |
| Cl(1)-Pt(1)-Cl(2)  | 89.88(2)   |
| Cl(3)-Pt(1)-Cl(2)  | 178.42(2)  |
| C(12)-Pt(1)-H(16A) | 164.0(9)   |
| N(1)-Pt(1)-H(16A)  | 87.3(8)    |
| Cl(1)-Pt(1)-H(16A) | 92.2(8)    |
| Cl(3)-Pt(1)-H(16A) | 76.7(9)    |
| Cl(2)-Pt(1)-H(16A) | 102.1(9)   |
| C(2)-N(1)-C(6)     | 121.7(2)   |
| C(2)-N(1)-Pt(1)    | 124.98(17) |
| C(6)-N(1)-Pt(1)    | 113.34(17) |
| N(1)-C(2)-C(3)     | 118.4(2)   |
| N(1)-C(2)-C(13)    | 121.4(2)   |
| C(3)-C(2)-C(13)    | 120.1(2)   |
| C(2)-C(3)-C(4)     | 120.8(2)   |
| C(2)-C(3)-H(3A)    | 119.6      |
| C(4)-C(3)-H(3A)    | 119.6      |
| C(5)-C(4)-C(3)     | 119.7(3)   |
| C(5)-C(4)-H(4A)    | 120.2      |
| C(3)-C(4)-H(4A)    | 120.2      |
| C(4)-C(5)-C(6)     | 119.0(3)   |
| C(4)-C(5)-H(5A)    | 120.5      |
| C(6)-C(5)-H(5A)    | 120.5      |
| N(1)-C(6)-C(5)     | 120.4(2)   |
| N(1)-C(6)-C(7)     | 114.2(2)   |
| C(5)-C(6)-C(7)     | 125.4(3)   |
| C(12)-C(7)-C(8)    | 118.2(2)   |
| C(12)-C(7)-C(6)    | 117.7(2)   |
| C(8)-C(7)-C(6)     | 124.1(3)   |
| C(9)-C(8)-C(7)     | 120.6(3)   |
| C(9)-C(8)-H(8A)    | 119.7      |
| C(7)-C(8)-H(8A)    | 119.7      |
| C(10)-C(9)-C(8)    | 118.0(3)   |
| C(10)-C(9)-H(9A)   | 121.0      |
| C(8)-C(9)-H(9A)    | 121.0      |
| F(10)-C(10)-C(9)   | 118.1(2)   |
| F(10)-C(10)-C(11)  | 117.5(3)   |
| C(9)-C(10)-C(11)   | 124.4(3)   |
| C(10)-C(11)-C(12)  | 115.9(3)   |
| C(10)-C(11)-H(11A) | 122.0      |
| C(12)-C(11)-H(11A) | 122.0      |
| C(11)-C(12)-C(7)   | 122.8(3)   |
| C(11)-C(12)-Pt(1)  | 125.8(2)   |
| C(7)-C(12)-Pt(1)   | 111.38(19) |
| C(16)-C(13)-C(2)   | 115.2(2)   |
| C(16)-C(13)-C(15)  | 109.1(2)   |
| C(2)-C(13)-C(15)   | 108.1(2)   |
| C(16)-C(13)-C(14)  | 105.7(2)   |
| C(2)-C(13)-C(14)   | 109.0(2)   |
| C(15)-C(13)-C(14)  | 109.5(2)   |
| C(13)-C(14)-H(14A) | 109.5      |
| C(13)-C(14)-H(14B) | 109.5      |

|                     |           |
|---------------------|-----------|
| H(14A)-C(14)-H(14B) | 109.5     |
| C(13)-C(14)-H(14C)  | 109.5     |
| H(14A)-C(14)-H(14C) | 109.5     |
| H(14B)-C(14)-H(14C) | 109.5     |
| C(13)-C(15)-H(15A)  | 109.5     |
| C(13)-C(15)-H(15B)  | 109.5     |
| H(15A)-C(15)-H(15B) | 109.5     |
| C(13)-C(15)-H(15C)  | 109.5     |
| H(15A)-C(15)-H(15C) | 109.5     |
| H(15B)-C(15)-H(15C) | 109.5     |
| C(13)-C(16)-H(16A)  | 112.2(18) |
| C(13)-C(16)-H(16B)  | 103.6(17) |
| H(16A)-C(16)-H(16B) | 105(2)    |
| C(13)-C(16)-H(16C)  | 107(2)    |
| H(16A)-C(16)-H(16C) | 118(3)    |
| H(16B)-C(16)-H(16C) | 110(3)    |

Table 3. Anisotropic displacement parameters ( $\text{\AA}^2 \times 10^3$ ) for sc14.

The anisotropic displacement factor exponent takes the form:

$$-2 \pi^2 [ h^2 a^{*2} U_{11} + \dots + 2 h k a^* b^* U_{12} ]$$

|       | U11   | U22   | U33   | U23   | U13   | U12   |
|-------|-------|-------|-------|-------|-------|-------|
| Pt(1) | 11(1) | 10(1) | 9(1)  | 0(1)  | 4(1)  | 1(1)  |
| N(1)  | 10(1) | 10(1) | 11(1) | 1(1)  | 6(1)  | 1(1)  |
| Cl(1) | 22(1) | 14(1) | 15(1) | 4(1)  | 6(1)  | 1(1)  |
| Cl(2) | 14(1) | 20(1) | 11(1) | 1(1)  | 6(1)  | 3(1)  |
| C(2)  | 9(1)  | 15(1) | 12(1) | -2(1) | 5(1)  | 1(1)  |
| Cl(3) | 14(1) | 19(1) | 19(1) | -3(1) | 7(1)  | 3(1)  |
| C(3)  | 17(1) | 20(1) | 9(1)  | 1(1)  | 4(1)  | 2(1)  |
| C(4)  | 20(2) | 13(1) | 16(1) | 3(1)  | 9(1)  | 2(1)  |
| C(5)  | 17(1) | 13(1) | 16(1) | 1(1)  | 8(1)  | 1(1)  |
| C(6)  | 13(1) | 12(1) | 16(1) | -1(1) | 9(1)  | 1(1)  |
| C(7)  | 11(1) | 15(1) | 13(1) | -2(1) | 5(1)  | 1(1)  |
| C(8)  | 15(1) | 15(1) | 18(1) | -3(1) | 10(1) | -2(1) |
| C(9)  | 15(1) | 20(1) | 14(1) | -8(1) | 3(1)  | -2(1) |
| F(10) | 30(1) | 30(1) | 11(1) | -1(1) | -1(1) | -1(1) |
| C(10) | 16(1) | 25(2) | 11(1) | -2(1) | 3(1)  | 5(1)  |
| C(11) | 16(1) | 18(1) | 14(1) | 1(1)  | 7(1)  | 5(1)  |
| C(12) | 10(1) | 13(1) | 14(1) | -3(1) | 5(1)  | 2(1)  |
| C(13) | 12(1) | 14(1) | 11(1) | -3(1) | 6(1)  | -3(1) |
| C(14) | 14(1) | 20(1) | 16(1) | -3(1) | 4(1)  | -1(1) |
| C(15) | 18(2) | 14(1) | 17(1) | -1(1) | 11(1) | 0(1)  |
| C(16) | 20(2) | 16(1) | 12(1) | -1(1) | 7(1)  | -4(1) |

Table 4. Hydrogen coordinates ( $\times 10^4$ ) and isotropic displacement parameters ( $\text{\AA}^2 \times 10^3$ ) for sc14.

|        | x    | y     | z    | U(eq) |
|--------|------|-------|------|-------|
| H(3A)  | 1302 | 8769  | 1216 | 18    |
| H(4A)  | 2169 | 11207 | 1911 | 19    |
| H(5A)  | 3037 | 11314 | 3486 | 18    |
| H(8A)  | 3932 | 11090 | 4989 | 18    |
| H(9A)  | 4856 | 10625 | 6542 | 21    |
| H(11A) | 3770 | 5859  | 6238 | 18    |

|        |          |          |          |    |
|--------|----------|----------|----------|----|
| H(14A) | 28       | 7020     | 734      | 25 |
| H(14B) | -514     | 6789     | 1478     | 25 |
| H(14C) | -424     | 5245     | 879      | 25 |
| H(15A) | 1926     | 5848     | 1016     | 23 |
| H(15B) | 1433     | 4065     | 1089     | 23 |
| H(15C) | 2513     | 4718     | 1889     | 23 |
| H(16A) | 1590(30) | 4060(40) | 2990(20) | 24 |
| H(16B) | 490(30)  | 3580(40) | 2090(20) | 24 |
| H(16C) | 370(30)  | 5010(40) | 2750(20) | 24 |

---

## Computation studies on 5

Studies were conducted using both B3LYP/LANL2DZ and MP2/LANL2DZ levels of theory, using Gaussian 03.

Gaussian 03: Gaussian 03, Revision D.01,

M. J. Frisch, G. W. Trucks, H. B. Schlegel, G. E. Scuseria, M. A. Robb, J. R. Cheeseman, J. A. Montgomery, Jr., T. Vreven, K. N. Kudin, J. C. Burant, J. M. Millam, S. S. Iyengar, J. Tomasi, V. Barone, B. Mennucci, M. Cossi, G. Scalmani, N. Rega, G. A. Petersson, H. Nakatsuji, M. Hada, M. Ehara, K. Toyota, R. Fukuda, J. Hasegawa, M. Ishida, T. Nakajima, Y. Honda, O. Kitao, H. Nakai, M. Klene, X. Li, J. E. Knox, H. P. Hratchian, J. B. Cross, V. Bakken, C. Adamo, J. Jaramillo, R. Gomperts, R. E. Stratmann, O. Yazyev, A. J. Austin, R. Cammi, C. Pomelli, J. W. Ochterski, P. Y. Ayala, K. Morokuma, G. A. Voth, P. Salvador, J. J. Dannenberg, V. G. Zakrzewski, S. Dapprich, A. D. Daniels, M. C. Strain, O. Farkas, D. K. Malick, A. D. Rabuck, K. Raghavachari, J. B. Foresman, J. V. Ortiz, Q. Cui, A. G. Baboul, S. Clifford, J. Cioslowski, B. B. Stefanov, G. Liu, A. Liashenko, P. Piskorz, I. Komaromi, R. L. Martin, D. J. Fox, T. Keith, M. A. Al-Laham, C. Y. Peng, A. Nanayakkara, M. Challacombe, P. M. W. Gill, B. Johnson, W. Chen, M. W. Wong, C. Gonzalez, and J. A. Pople, Gaussian, Inc., Wallingford CT, 2004.

XYZ coordinates for lowest energy conformer  
MP2/LANL2DZ: E = -894.690238 a.u.

| #  | Symbol | X         | Y         | Z         |
|----|--------|-----------|-----------|-----------|
| 1  | Pt     | 0.191420  | -0.814383 | 0.031414  |
| 2  | N      | 0.738181  | 1.140317  | -0.175679 |
| 3  | C      | -0.228576 | 2.110083  | -0.378869 |
| 4  | C      | 0.171728  | 3.463223  | -0.519882 |
| 5  | C      | 2.077257  | 1.421656  | -0.031397 |
| 6  | C      | 2.506846  | 2.771606  | -0.176959 |
| 7  | C      | 1.554001  | 3.793623  | -0.430231 |
| 8  | C      | -1.639271 | 1.616909  | -0.368505 |
| 9  | C      | 3.002445  | 0.244251  | 0.317709  |
| 10 | C      | 3.773360  | 0.582181  | 1.645265  |
| 11 | C      | 2.169785  | -1.073711 | 0.573449  |
| 12 | C      | 4.022642  | 0.014833  | -0.852384 |
| 13 | C      | -2.593983 | 2.226918  | 0.500725  |
| 14 | C      | -3.900318 | 1.681412  | 0.622413  |
| 15 | C      | -4.216767 | 0.525488  | -0.131164 |
| 16 | C      | -3.312770 | -0.092686 | -1.021773 |

|    |    |           |           |           |
|----|----|-----------|-----------|-----------|
| 17 | C  | -2.008321 | 0.469023  | -1.149363 |
| 18 | F  | -5.521778 | -0.027858 | 0.008179  |
| 19 | Cl | -0.437345 | -0.273062 | 2.300310  |
| 20 | Cl | -0.460367 | -3.094483 | 0.300745  |
| 21 | Cl | 0.838671  | -1.202553 | -2.280276 |
| 22 | H  | 4.705907  | -0.812489 | -0.586144 |
| 23 | H  | 4.633128  | 0.921577  | -1.026194 |
| 24 | H  | 3.489501  | -0.247488 | -1.781317 |
| 25 | H  | 4.408848  | -0.276866 | 1.928100  |
| 26 | H  | 3.058550  | 0.778000  | 2.465335  |
| 27 | H  | 4.428934  | 1.464416  | 1.518801  |
| 28 | H  | -3.611382 | -0.970301 | -1.598967 |
| 29 | H  | 1.878816  | 4.829893  | -0.551448 |
| 30 | H  | 3.568244  | 3.010392  | -0.080590 |
| 31 | H  | -4.642757 | 2.112333  | 1.298069  |
| 32 | H  | -1.348157 | 0.092528  | -1.936487 |
| 33 | H  | -2.301251 | 3.077063  | 1.123615  |
| 34 | H  | -0.585715 | 4.226972  | -0.711125 |
| 35 | H  | 2.127979  | -1.338886 | 1.642572  |
| 36 | H  | 2.522673  | -1.913978 | -0.045821 |

XYZ coordinates and energy for the structure corresponding to barrier  
MP2/LANL2DZ: E = -894.687936

| #  | Symbol | X         | Y         | Z         |
|----|--------|-----------|-----------|-----------|
| 1  | Pt     | -0.205414 | -0.823692 | 0.010628  |
| 2  | N      | -0.746172 | 1.134458  | -0.028791 |
| 3  | C      | 0.244384  | 2.095348  | -0.076495 |
| 4  | C      | -0.126367 | 3.462064  | -0.109963 |
| 5  | C      | -2.089687 | 1.418200  | -0.007989 |
| 6  | C      | -2.492266 | 2.783947  | -0.042748 |
| 7  | C      | -1.510274 | 3.808034  | -0.095158 |
| 8  | C      | 1.652053  | 1.568897  | -0.062261 |
| 9  | C      | -3.047092 | 0.218851  | 0.053047  |
| 10 | C      | -3.953123 | 0.221307  | -1.228996 |
| 11 | C      | -2.248214 | -1.141920 | 0.108587  |
| 12 | C      | -3.925900 | 0.330487  | 1.349448  |
| 13 | C      | 2.287896  | 1.190176  | -1.287811 |
| 14 | C      | 3.624400  | 0.703163  | -1.275214 |
| 15 | C      | 4.287130  | 0.614658  | -0.030304 |
| 16 | C      | 3.692979  | 0.979400  | 1.200095  |
| 17 | C      | 2.357504  | 1.464346  | 1.178872  |
| 18 | F      | 5.628442  | 0.130239  | -0.012616 |
| 19 | Cl     | -0.332789 | -0.821460 | -2.406579 |



|    |    |           |           |           |
|----|----|-----------|-----------|-----------|
| 20 | Cl | 0.480165  | -3.105349 | 0.058293  |
| 21 | Cl | -0.111146 | -0.648155 | 2.421387  |
| 22 | H  | -4.615074 | -0.532013 | 1.403337  |
| 23 | H  | -4.534278 | 1.254605  | 1.343767  |
| 24 | H  | -3.282024 | 0.327022  | 2.247364  |
| 25 | H  | -4.652037 | -0.634102 | -1.188221 |
| 26 | H  | -3.329539 | 0.128314  | -2.135820 |
| 27 | H  | -4.551459 | 1.149795  | -1.293938 |
| 28 | H  | 4.250884  | 0.869829  | 2.132457  |
| 29 | H  | -1.813388 | 4.857626  | -0.122728 |
| 30 | H  | -3.556131 | 3.031441  | -0.027871 |
| 31 | H  | 4.130492  | 0.390662  | -2.191040 |
| 32 | H  | 1.859326  | 1.733639  | 2.112456  |
| 33 | H  | 1.744650  | 1.265644  | -2.231412 |
| 34 | H  | 0.655465  | 4.223767  | -0.148238 |
| 35 | H  | -2.461820 | -1.786692 | -0.758720 |
| 36 | H  | -2.392017 | -1.672287 | 1.063368  |
